# Supplementary material for: Deformation mechanisms in high-efficiency thermoelectric layered Zintl compounds
Source: Royal Society of Chemistry journal article supplement (doi:10.1039/c7ta02080e), 2017-01-01
Supplement: c7ta02080e1.pdf [file c7ta02080e1.pdf]

## **Supporting information**

### Deformation Mechanisms in the High-Efficiency Thermoelectric Layered Zintl Compounds

Guodong Li <sup>†,‡</sup>, Umut Aydemir <sup>‡</sup>, Max Wood <sup>‡</sup>, Qi An <sup>\*,§,||</sup>, William A. Goddard III <sup>⊥</sup>, Pengcheng Zhai <sup>†</sup>, Qingjie Zhang <sup>\*,†</sup>, and G. Jeffrey Snyder <sup>\*,‡</sup>

<sup>†</sup>State Key Laboratory of Advanced Technology for Materials Synthesis and Processing, Wuhan University of Technology, Wuhan 430070, China.

<sup>‡</sup>Department of Materials Science and Engineering, Northwestern University, Evanston, Illinois 60208, USA.

<sup>§</sup>Department of Chemical and Materials Engineering, University of Nevada, Reno, Reno, Nevada, 89557, USA.

<sup>||</sup>Nevada Institute for Sustainability, University of Nevada, Reno, Reno, Nevada, 89557, USA.

<sup>⊥</sup>Materials and Process Simulation Center, California Institute of Technology, Pasadena, California 91125, USA.

\*Corresponding authors: jeff.snyder@northwestern.edu; zhangqj@whut.edu.cn; qia@unr.edu

## Deformation mechanisms of $\text{Mg}_3\text{Sb}_2$ along the $(001)/\langle 100 \rangle$ slip system

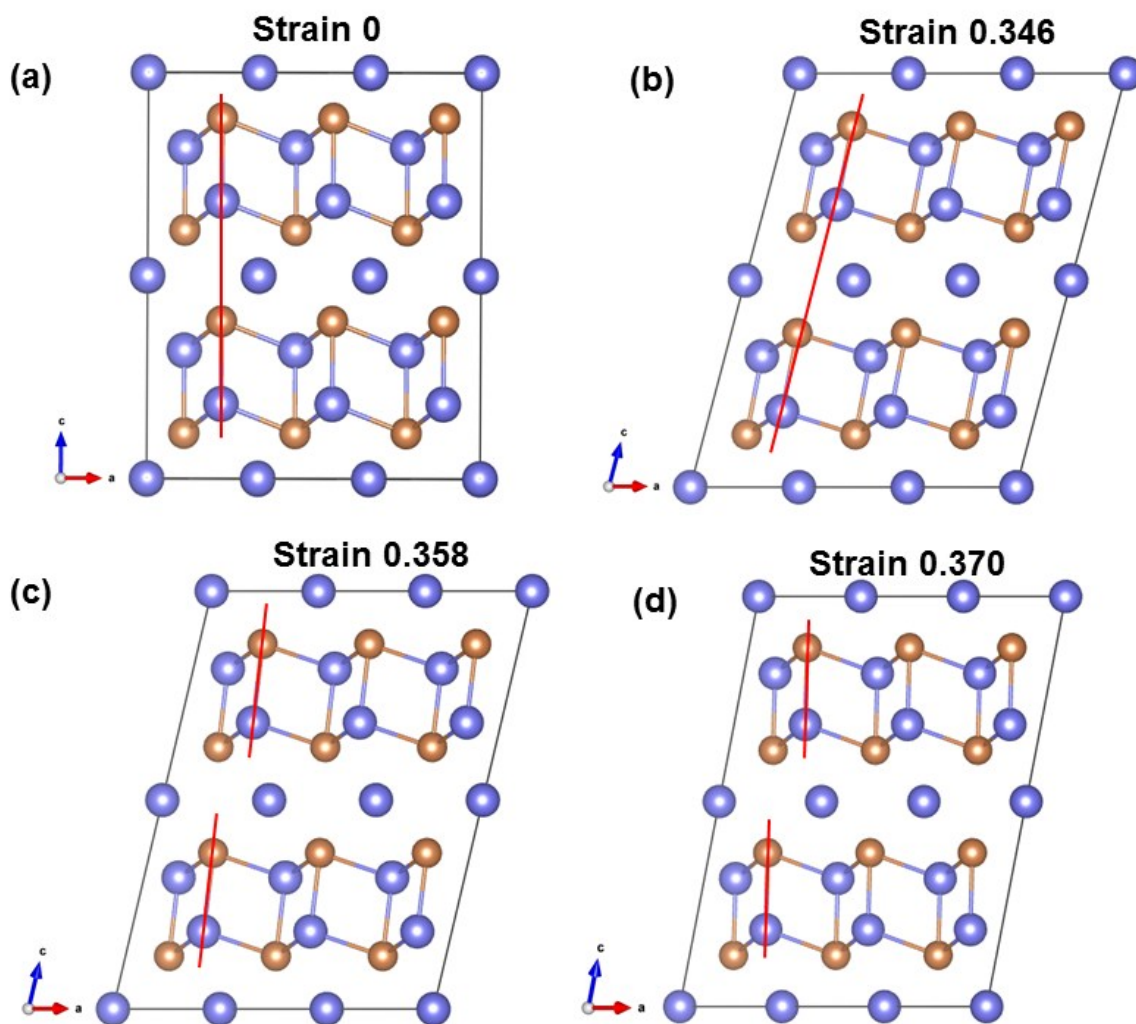

**Figure S1.** The atomic structures of  $\text{Mg}_3\text{Sb}_2$  along the  $(001)/\langle 100 \rangle$  slip system: (a) structure at strain 0 corresponding to the equilibrium condition, (b) structure 0.346 corresponding to the ideal strength, (c) structure at 0.358 strain before failure strain, (d) structure at failure strain of 0.370. The red lines displayed in Figure S1 show the slippage of layered  $[\text{Mg}_2\text{Sb}_2]^{2-}$  substructures.

## Deformation mechanisms of $\text{Mg}_3\text{Sb}_2$ along the $(100)/\langle 110 \rangle$ slip system

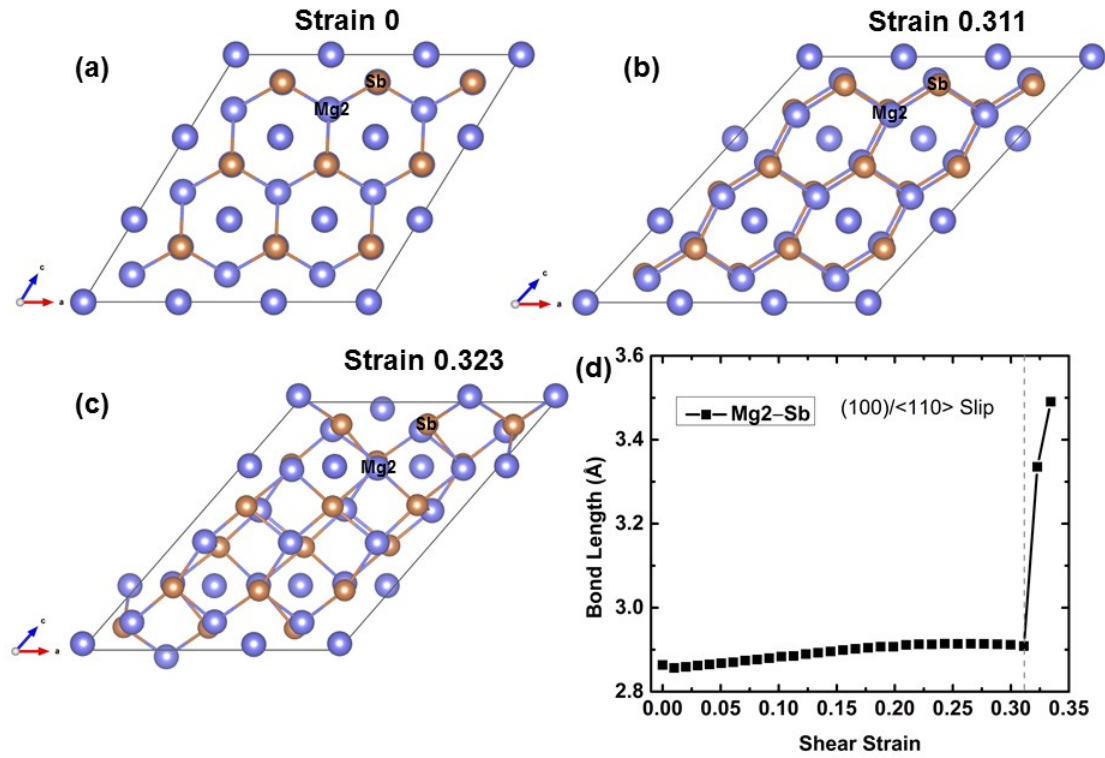

**Figure S2.** The atomic structures of  $\text{Mg}_3\text{Sb}_2$  along the  $(100)/\langle 110 \rangle$  slip system: (a) structure at strain 0 corresponding to the equilibrium condition, (b) structure at 0.311 strain before failure strain, (c) structure at failure strain of 0.323 corresponding to the critical point for bond breaking, (d) The average covalent Mg-Sb bond length with the increasing shear strain along the  $(100)/\langle 110 \rangle$  slip system. The gray dashed line in Figure S2(d) represents the strain just before failure.
